# Supplementary material for: Chromatographic paper-based analytical devices using an oxidized paper substrate
Source: Royal Society of Chemistry journal article supplement (doi:10.1039/c8ay02298d), 2018-12-10
Supplement: c8ay02298d1.pdf [file c8ay02298d1.pdf]

Supplementary information for  
Chromatographic paper-based analytical devices using an  
oxidized paper substrate  
Yuki Hashimoto and Takashi Kaneta

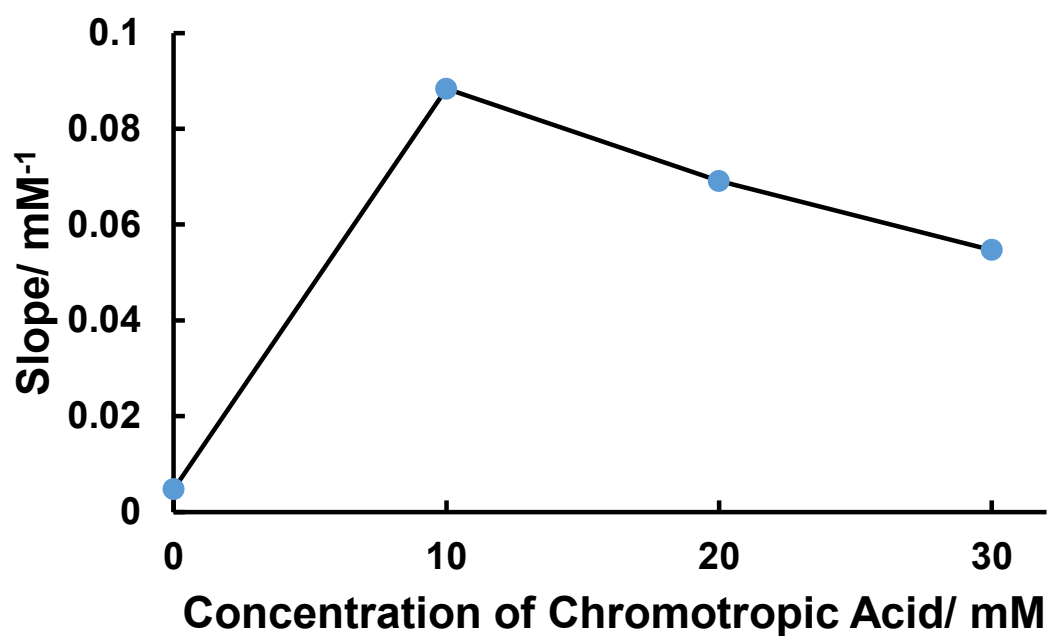

Fig. S1 Effect of the concentration of chromotropic acid on sensitivity. The sensitivity is expressed by the slope of calibration curves.
